1                   **Ketamine and sleep modulate neural complexity dynamics in cats**

2

3                   Claudia Pascovich<sup>1,2</sup>, Santiago Castro-Zaballa<sup>1</sup>, Pedro A.M. Mediano<sup>2</sup>, Daniel Bor<sup>2</sup>, Andrés  
4                   Canales-Johnson<sup>2,3</sup>, Pablo Torterolo<sup>1\*</sup> and Tristan A. Bekinschtein<sup>2\*</sup>.

5

6                   1. *Laboratory of Sleep Neurobiology, Department of Physiology, School of Medicine,*  
7                   *Universidad de la República, Uruguay.*

8                   2. *Consciousness and Cognition Laboratory, Department of Psychology, University of*  
9                   *Cambridge, UK*

10                  3. *Vicerrectoría de Investigación y Posgrado, Universidad Católica del Maule, Talca, Chile*

11

12                  \*Shared senior authors

13                  Correspondence: cpascovich@gmail.com (C.P.)

14

15 **In brief**

16 Previous studies have shown that Lempel Ziv complexity (LZ) decreases during anesthesia and  
17 non-rapid eyes movement (NREM) sleep in humans and rats whereas it increases in REM sleep  
18 and under the effect of psychedelics. In this work we show that in the cat, LZ is lowest in NREM  
19 sleep, but similar in REM and wakefulness. We also found a ketamine inverted U-shape dose-  
20 response curve only in the auditory and prefrontal cortex, with a much larger variability in the  
21 ketamine across cats and cortices when compared to the sleep cycle.

22  
23

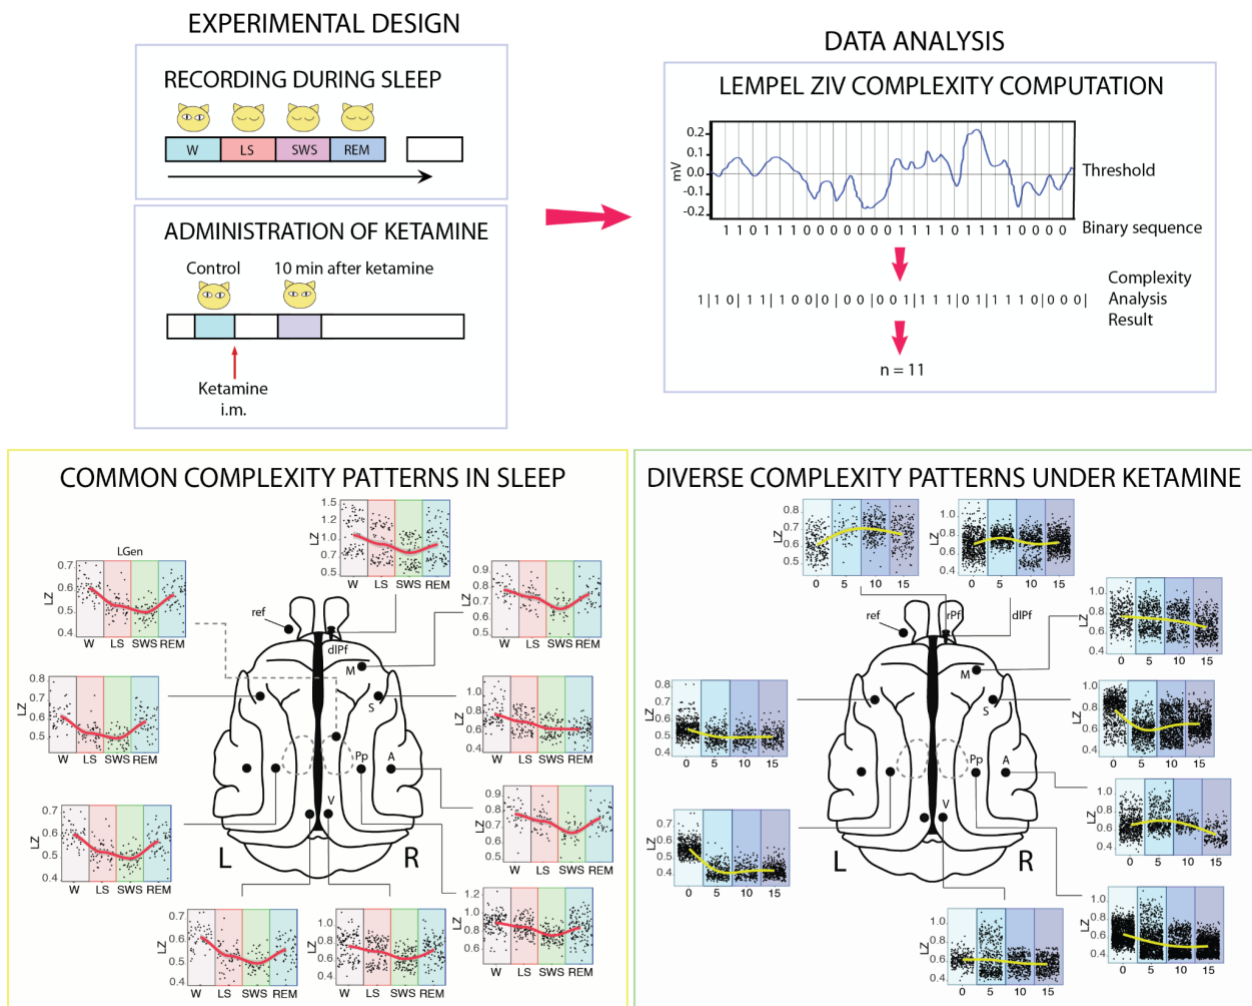

24  
25  
26  
27

28

29

30 **Abstract**

31

32 There is increasing evidence that level of consciousness can be captured by neural informational  
33 complexity: for instance, complexity, as measured by the Lempel Ziv (LZ) compression algorithm,  
34 decreases during anesthesia and non-rapid eye movement (NREM) sleep in humans and rats, when  
35 compared to LZ in awake and REM sleep. In contrast, LZ is higher in humans under the effect of  
36 psychedelics, including subanesthetic doses of ketamine. However, it is both unclear how this  
37 result would be modulated by varying ketamine doses, and whether it would extend to other  
38 species. Here we studied LZ with and without auditory stimulation during wakefulness and  
39 different sleep stages in 5 cats implanted with intracranial electrodes, as well as under  
40 subanesthetic doses of ketamine (5, 10, and 15 mg/kg i.m.). In line with previous results, LZ was  
41 lowest in NREM sleep, but similar in REM and wakefulness. Furthermore, we found an inverted  
42 U-shaped curve following different levels of ketamine doses in a subset of electrodes, primarily in  
43 prefrontal cortex. However, it is worth noting that the variability in the ketamine dose-response  
44 curve across cats and cortices was larger than that in the sleep-stage data, highlighting the  
45 differential local dynamics created by two different ways of modulating conscious state. These  
46 results replicate previous findings, both in humans and other species, demonstrating that neural  
47 complexity is highly sensitive to capture state changes between wake and sleep stages while adding  
48 a local cortical description. Finally, this study describes the differential effects of ketamine doses,  
49 replicating a rise in complexity for low doses, and further fall as doses approach anesthetic levels  
50 in a differential manner depending on the cortex.

51

52 **Keywords**

53

54 Ketamine; Sleep; Psychedelics; Complexity; Local Field Potential; Cortex; Thalamus; Cats

55

56

57

58

59

60

## 61 **Introduction**

62

63 There is increasing evidence for a strong association between neural information measures, such  
64 as electrophysiological signal complexity, and level of consciousness (Abásolo et al., 2015;  
65 Castro-Zaballa et al., 2019; Mateos et al., 2018; Schartner et al., 2015; Schartner, 2017; Zhang et  
66 al., 2001). One of the most studied neural complexity metrics is Lempel-Ziv complexity (LZ),  
67 capturing the number of distinct substrings or patterns within a sequence (Lempel & Ziv, 1976;  
68 Ziv & Lempel, 1978). A decrease in complexity has been demonstrated for anesthesia (Li &  
69 Mashour, 2019; Schartner et al., 2015; Zhang et al., 2001), and during non-rapid eye movement  
70 sleep (NREM sleep) when compared to normal wakefulness. However, REM complexity has  
71 consistently been shown to be above NREM sleep and below normal wakefulness (Abásolo et al.,  
72 2015; Andrillon et al., 2016; Mateos et al., 2018; Schartner et al., 2017). The increase in  
73 complexity during REM, where vivid dreaming often occurs, may lend credence to the hypothesis  
74 that complexity may not only be modulated by consciousness level but also signal the degree of  
75 contents of consciousness (Abásolo et al., 2015; Mateos et al., 2018).

76

77 Further evidence for LZ associated with an increase in the range of conscious contents comes from  
78 higher LZ during resting state in humans under the effect of psychedelics, specifically lysergic  
79 acid diethylamide (LSD), psilocybin, and subanesthetic doses of the dissociative NMDA-  
80 antagonist ketamine, compared to placebo (Li & Mashour, 2019; Mediano et al., 2020; Schartner,  
81 et al., 2017). These drugs have profound and widespread effects on conscious experiences, both  
82 internally and externally generated. More specifically, they appear to “broaden” the scope of  
83 conscious contents, vivifying imagination and positively modulating the flexibility of cognition  
84 (Carhart-Harris et al., 2016; Carhart-Harris et al., 2014). For all three drugs, reliably higher  
85 spontaneous signal diversity was reported. More recently, a higher level of complexity following  
86 a subanesthetic dose of ketamine was also reported (Farnes et al., 2020; Li & Mashour, 2019) in  
87 spontaneous high-density scalp electroencephalography (EEG) signals in healthy volunteers, but  
88 no increase was observed when auditorily stimulated.

89

90 Ketamine also appears to maintain spatiotemporal complexity, as measured through the  
91 perturbational complexity index (PCI) (Sarasso et al., 2015). PCI is the result of applying LZ to  
92 the spatiotemporal pattern of cortical activation evoked by transcranial magnetic stimulation  
93 (TMS), and has proven to be a reliable classifier of level of consciousness (Casali et al., 2013).  
94 PCI decreases during propofol, midazolam and xenon anesthesia (Casali et al., 2013), but  
95 maintains wakefulness baseline level during ketamine anesthesia (Sarasso et al., 2015).

96  
97 Despite this body of work, important questions remain unanswered. First, prior studies provide  
98 only a disjointed picture by investigating the effect of anesthetic dose in TMS-evoked cortical  
99 activation (Sarasso et al., 2015) or subanesthetic dose in spontaneous magnetoencephalographic  
100 (MEG) signals (Schartner et al., 2017). For a more complete understanding of ketamine's  
101 psychoactive effects, a systematic investigation of the dose-dependent effects of ketamine on  
102 cortical complexity using the same modality is required. Therefore, in this work we aimed to  
103 investigate the level of informational complexity during different stages of sleep in the cat as well  
104 as under subanesthetic doses of ketamine in a dose-dependent manner, compared to the control  
105 awake state. Additionally, we determined how the complexity measures under ketamine compared  
106 to baseline conditions, with or without the presence of sensory stimulation. Finally, we sought to  
107 understand the possible differences in informational complexity between resting-state periods and  
108 sensory stimulation periods across conscious states. We aim to add to the characterization of the  
109 interaction between psychedelic states and perturbational states in intracranial recordings and via  
110 dose dependent manner since our own work suggests a modulation by task (Mediano et al. 2020;  
111 Mediano et al, 2021) while others don't (Farnes et al., 2020). Accordingly (Pascovich et al., 2019),  
112 the following hypotheses were proposed: (1) LZ would reflect sleep level: LZ in wakefulness  
113 would be just above REM sleep. REM sleep would be above light sleep (LS), and NREM sleep  
114 would have the lowest complexity value; (2) LZ would be increased during the initial period of  
115 drug infusion compared to baseline wakefulness; (3) the level of complexity would be higher under  
116 sensory stimulation compared to baseline, for both conditions, with and without ketamine; and (4)  
117 stimulation-induced complexity increase would be more evident under the effect of ketamine. This  
118 last hypothesis is line with the entropic brain theory, assuming that under psychedelics the diversity  
119 of mental states is increased and the experience produced by a stimuli is amplified by the brain  
120 under this state (Carhart-Harris et al., 2016; Carhart-Harris et al., 2014).

121

## 122 **Results**

123

### 124 *Sleep shows a state-dependent effect on Lempel-Ziv complexity*

125 Cats underwent a polysomnographic recording in semi-restricted conditions where they were  
126 adapted to sleep. Data were obtained during spontaneously occurring quiet wakefulness, LS,  
127 NREM sleep and REM sleep (Figure 1A). Examples of raw traces and power spectrum  
128 characterization in two cortices from one cat are presented in Figure 1D. For a more detailed  
129 description of power spectral density results see Castro et al. (2019).

130

131 LZ was computed using the LZ78 algorithm (Ziv & Lempel 1978; Figure 1C) from the different  
132 sleep stages for all the cortices available (Figure 2A). Effect sizes for differences between states  
133 at the single subject level are shown in Figure 2B. For all animals, LZ scored higher for  
134 wakefulness than NREM sleep (Cohen's  $d > 0.8$ ) for most of the cortices. As predicted, LZ values  
135 were highest for REM and W, intermediate for LS, and lowest for NREM.

136

137 Additionally, mixed effects models were formulated for each cortex including the cat as a random  
138 effect when applicable. Thereafter, model selection was performed between linear and quadratic  
139 models using Bayes Factors (BF) to decide between U-shaped and linear fits. All model  
140 comparisons between linear and non-linear quadratic fits showed the supremacy of the non-linear  
141 fit (Table 1) in agreement with our previous hypotheses, where the REM sleep showed higher  
142 complexity values than the deep sleep - with the exception of the right somatosensory cortex,  
143 where the results showed a flattening of the curve compared to all other cortices (Figure 2).

144

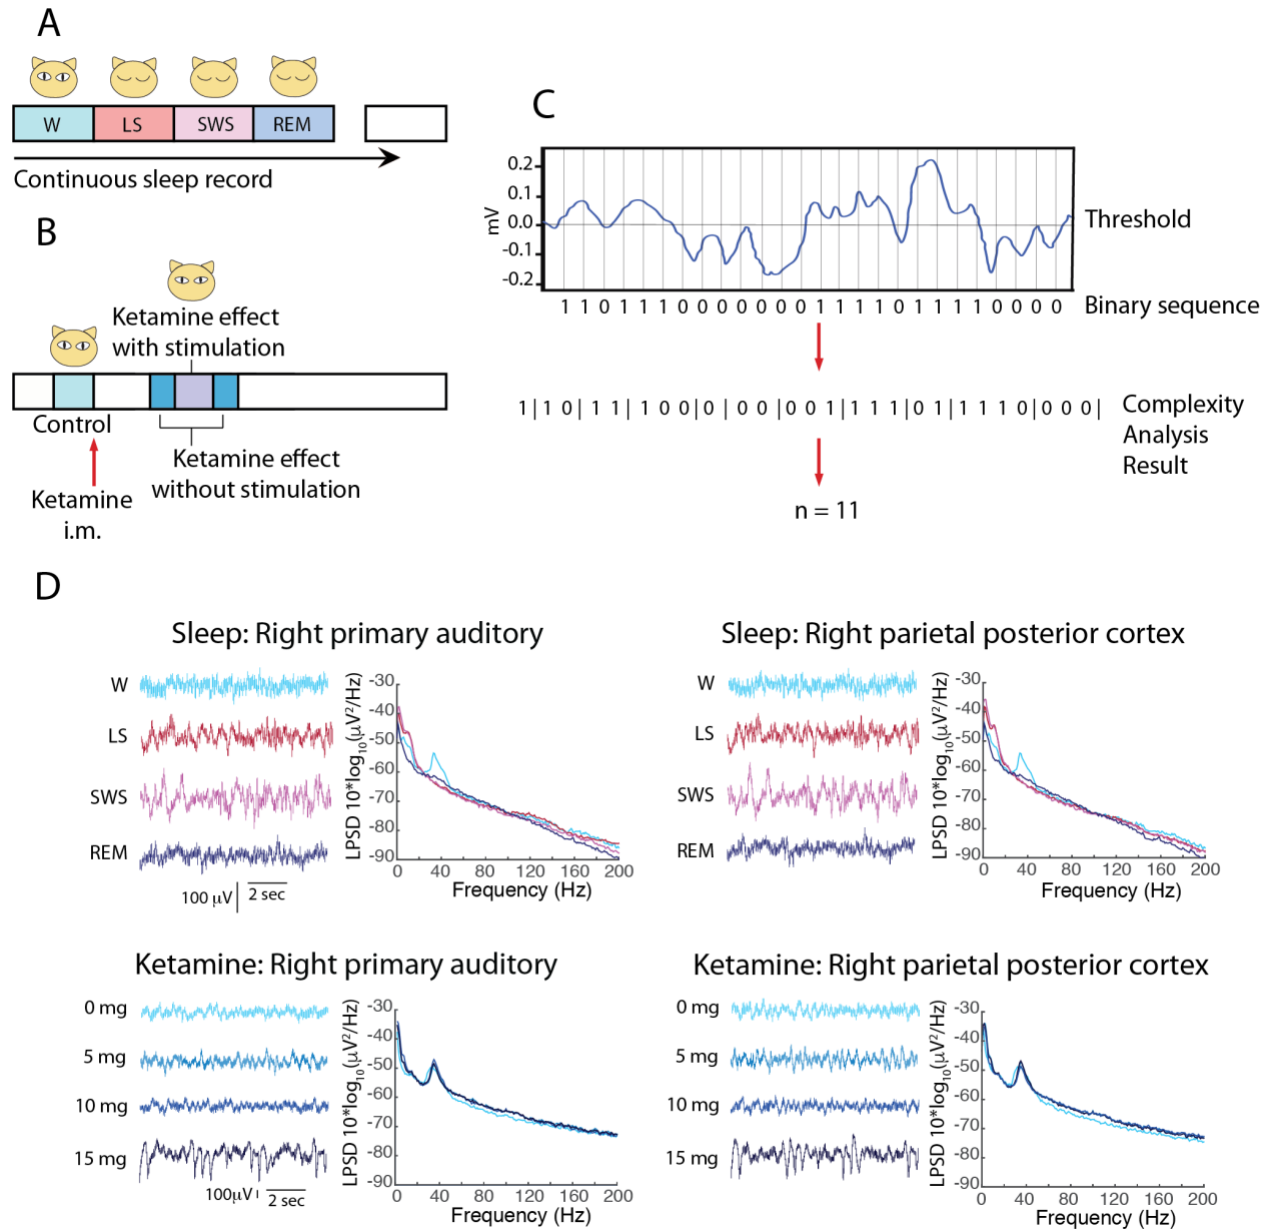

145

146 FIGURE 1. Schematic illustrating the experimental design for electrocorticographic recordings  
 147 during the different states of sleep (A) and before, and after the different doses of ketamine (B).  
 148 i.m., intramuscular. (C) Illustration showing how to transform a segment of ECoG signal series  
 149 into a binary sequence and the result of the LZ complexity analysis on the binary sequence.  
 150 (D) Raw traces and spectral characterization of sleep stages and different subanesthetic doses of  
 151 ketamine in one animal.

152

**A**

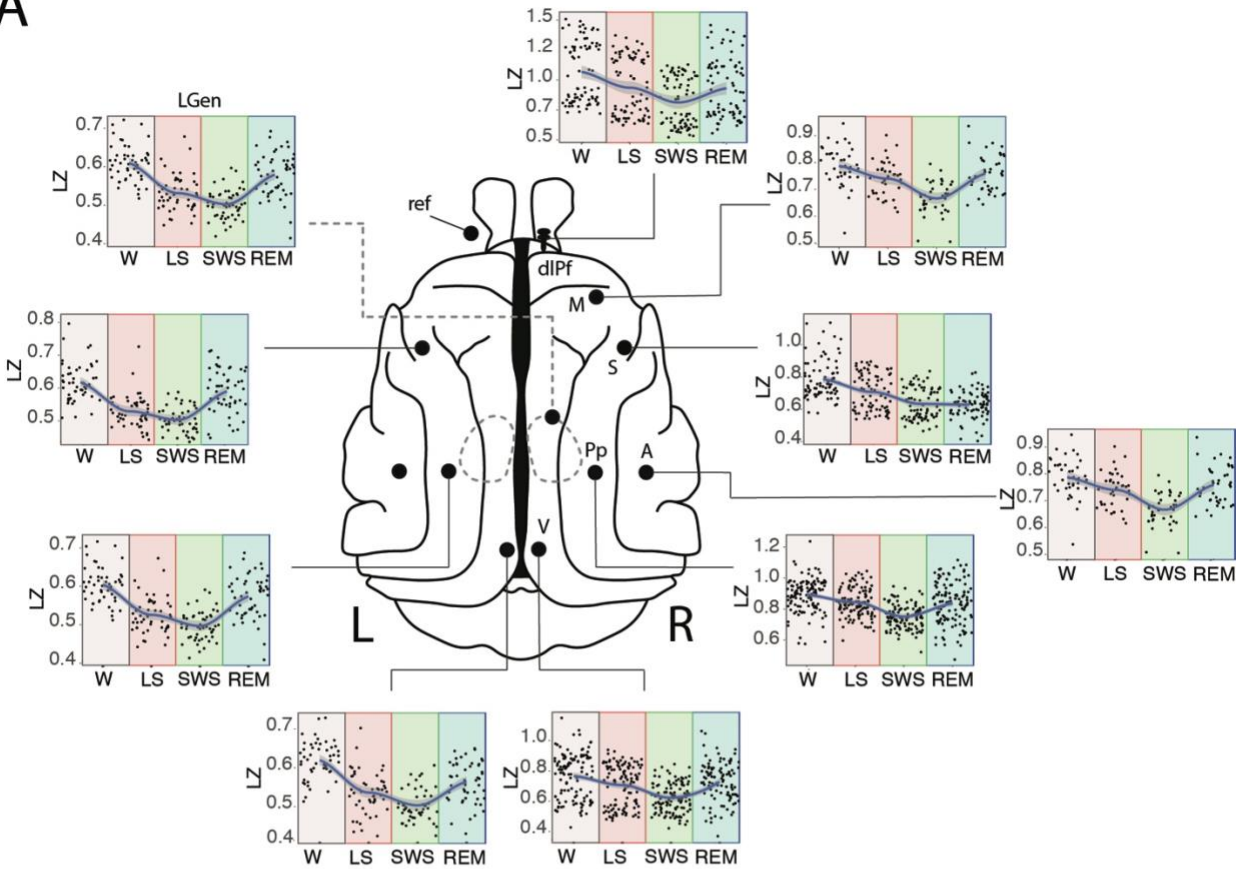

**B**

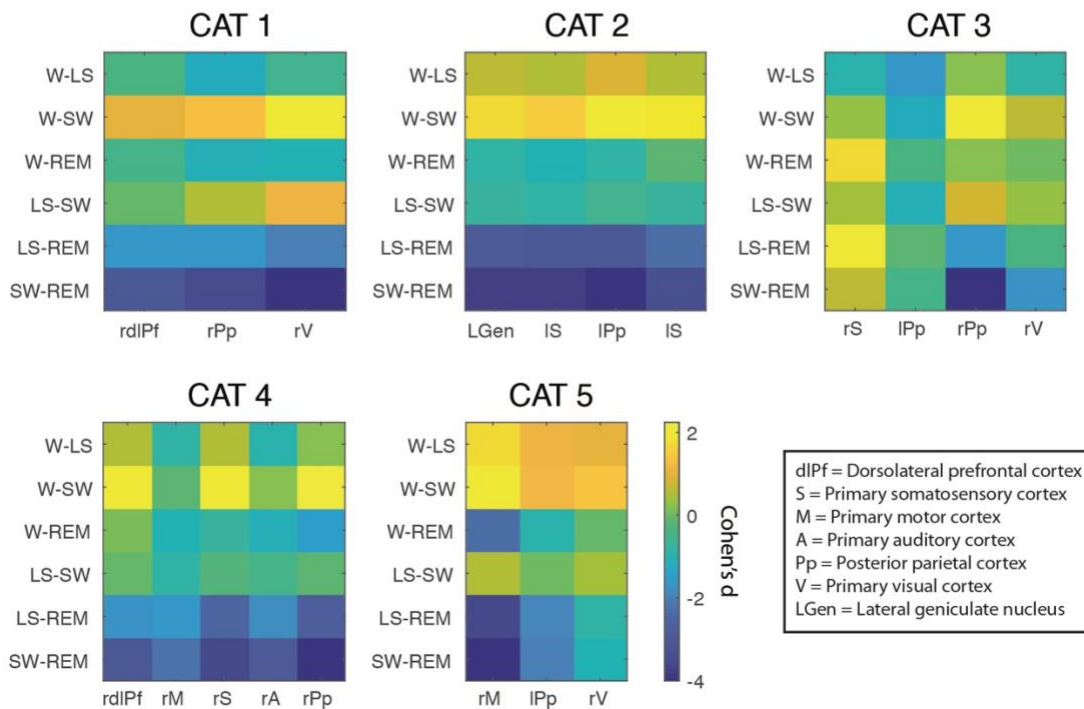



154 **FIGURE 2. Cortical dynamic of LZ during sleep.** Schematic representations of the cat brain are  
 155 used to visualize the differential dynamics of LZ during wakefulness and different states of sleep  
 156 (A), showing a U-shaped complexity curve with state progression from W to LS, SWS and REM.  
 157 “L” indicates Left side and “R” right side. (B) The differences in average LZ between sleep states,  
 158 as measured by ANOVA and Tukey post-hoc test. Effect sizes were calculated by Cohen’s d and  
 159 represented in a colour scale, where yellow means a positive difference and blue means a negative  
 160 difference between the effect sizes of the pair of states compared. W = wakefulness; LS = light  
 161 sleep; SWS = slow wave sleep; REM = rapid eye movements sleep; dIPf = dorsolateral prefrontal  
 162 cortex; Pp = posterior parietal cortex; V = visual cortex; LGen = lateral geniculate nucleus; S =  
 163 somatosensory cortex; M = motor cortex; A = auditory cortex; ref, reference electrode location. In  
 164 Figure B, “r” indicates right and “l” indicates left cortex.  
 165

| Cortex                        | Nº of cats | Model       | BF                    |
|-------------------------------|------------|-------------|-----------------------|
| Right dorsolateral prefrontal | 2          | linear      |                       |
|                               |            | quadratic * | 6.88x10 <sup>18</sup> |
| Right primary motor           | 2          | linear      |                       |
|                               |            | quadratic * | 1.90x10 <sup>17</sup> |
| Right primary auditory        | 1          | linear      |                       |
|                               |            | quadratic * | 4.42x10 <sup>6</sup>  |
| Right primary somatosensory   | 2          | linear      |                       |
|                               |            | quadratic   | 0.681                 |
| Left primary somatosensory    | 1          | linear      |                       |
|                               |            | quadratic * | 8.53x10 <sup>20</sup> |
| Right posterior parietal      | 3          | linear      |                       |
|                               |            | quadratic * | 1.76x10 <sup>7</sup>  |
| Left posterior parietal       | 1          | linear      |                       |
|                               |            | quadratic * | 7.19x10 <sup>9</sup>  |
| Right primary visual          | 3          | linear      |                       |
|                               |            | quadratic * | 3.70x10 <sup>11</sup> |
| Left primary visual           | 1          | linear      |                       |
|                               |            | quadratic * | 3.77x10 <sup>17</sup> |
| Right Lateral Geniculate      | 1          | linear      |                       |
|                               |            | quadratic * | 7.00x10 <sup>20</sup> |

166  
 167 **TABLE 1. Selection between linear and non-linear models among different sleep stages for**  
 168 **each cortex.** Mixed effects models were formulated for each cortex including the cat as a random

169 effect when applicable. Bayes Factors (BF) were used to decide between U-shaped and linear fits.  
170 With the exception of the right primary somatosensory cortex, all model comparisons showed the  
171 supremacy of the quadratic fit. The asterisks indicate substantial evidence for a quadratic fit (BF  
172 >5).

173

174

### 175 *Heterogeneous cortical dynamics across cortices under ketamine*

176

177 For this experiment, the data were collected under the same experimental conditions as for sleep  
178 recordings in the same cats, and i.m. injections of ketamine of 5, 10 or 15 mg/Kg were performed  
179 in separate non-consecutive days as schematized in Figure 1B (see Methods). The raw data shown  
180 in Figure 1D reveals the presence of slow waves with 15 mg/Kg dose of ketamine, whereas the  
181 power spectral density plots show an increase in gamma power, as already had been reported by  
182 Castro et al. (2019). Again, LZ was calculated in epochs before and after the administration of the  
183 drug. To address dose-response relationships, a multilevel model was used where LZ was predicted  
184 by dose (fixed effect), and cat and session were considered as random effects (with sessions nested  
185 within cats, and each dose of ketamine was repeated four times).

186

187 Considerably greater LZ variability was observed under ketamine than for the sleep results,  
188 especially during the lowest doses explored (Figure 3A). In some regions, the results are in  
189 agreement with our hypothesis, which predicted an increase in informational complexity after the  
190 lowest ketamine dose, followed by a decrease with the higher dose showing an inverted U-shaped  
191 relationship. This can be observed clearly in the right rostral and dorsolateral prefrontal cortices  
192 as well as the right primary auditory cortex (BF =  $1.70 \times 10^{14}$ , BF =  $2.57 \times 10^5$ , BF =  $8.25 \times 10^9$ ,  
193 respectively). However, when we look at the individual effect per cortex in each animal, it can be  
194 seen that the inverted U-shaped relationship is not systematic between cats and is present only in  
195 the cortices of 2 out of 5 cats (Figure 3B).

196

197 On the other hand, an opposite curve was obtained for somatosensory and posterior parietal  
198 cortices. Finally, for the visual cortex the effects were less consistent among cats; in this last  
199 example, the two cats tested had different responses to ketamine with opposite effects (Figure 3B).

200 As for sleep, we studied ketamine effects on LZ using model fitting of the individual mixed effects  
201 models for each cortex. Model selection was performed in this case between linear, quadratic and  
202 cubic models using BF (Table 2).

203  
204  
205

A

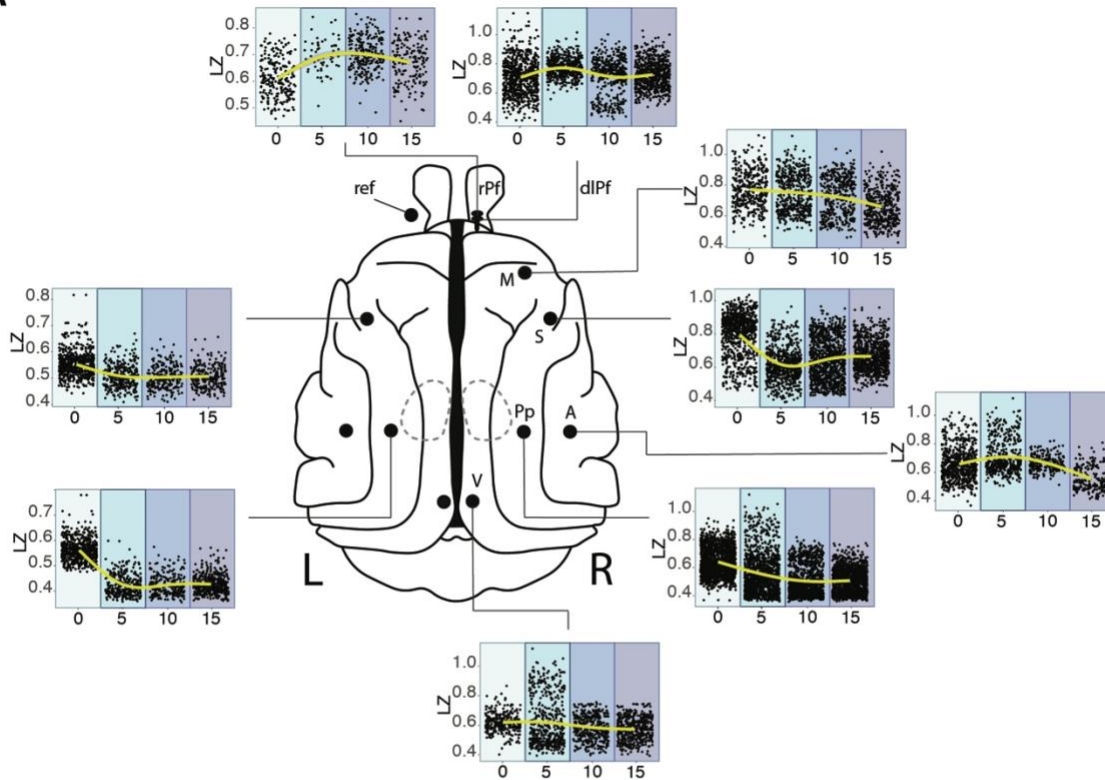

B

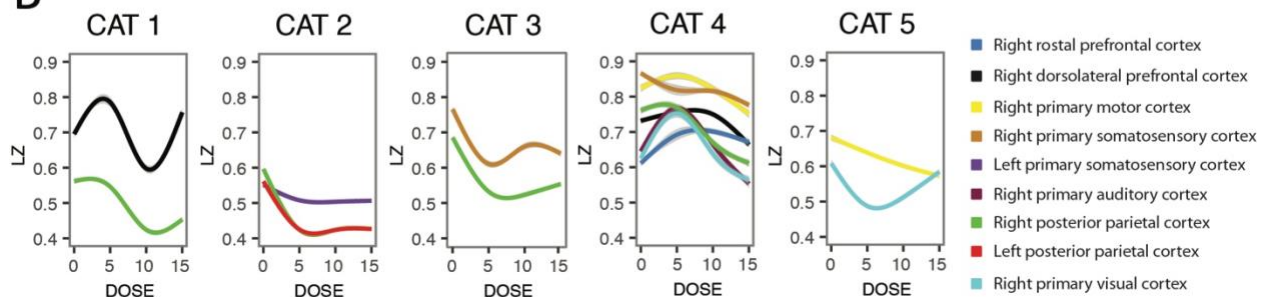

206  
207

208 **FIGURE 3. Curves dose-response of the dose of ketamine on cortical dynamics of LZ.** (A)  
209 Dose-response curve of subanesthetic doses of ketamine, showing an inverted U-shaped curve  
210 only for prefrontal and auditory cortices, with monotonic decrease of complexity with

211 concentration for the other cortices. Each plot represents the sum of the different sessions for each  
 212 dose of the different cats which have that cortex, therefore the N° of cats is different per cortex.  
 213 (B) The curves are plotted per cat. It can be clearly seen that the variability in the informational  
 214 complexity dynamic per cortex and per cat is evidenced more clearly when plotted individually,  
 215 and shows that there is a dissociation of the dose-response and the anatomical location. The doses  
 216 are represented in mg/Kg. rPf, rostral prefrontal cortex; dlPf, dorsolateral prefrontal cortex; M,  
 217 primary motor cortex; S, primary somatosensory cortex; A, primary auditory cortex, Pp, posterior  
 218 parietal cortex; V, visual cortex. “L” indicates the left side and “R” the right side.  
 219

| Cortex                        | N° of cats | Model       | BF                    |
|-------------------------------|------------|-------------|-----------------------|
| Right dorsolateral prefrontal | 2          | linear      |                       |
|                               |            | quadratic * | 2.57x10 <sup>5</sup>  |
|                               |            | cubic       | 288.73                |
| Right rostral prefrontal      | 1          | linear      |                       |
|                               |            | quadratic * | 1.70x10 <sup>14</sup> |
| Right primary motor           | 2          | linear      |                       |
|                               |            | quadratic   | 0.04                  |
| Right primary auditory        | 2          | linear      |                       |
|                               |            | quadratic * | 8.25x10 <sup>9</sup>  |
| Right primary somatosensory   | 3          | linear      |                       |
|                               |            | quadratic   | 3.0x10 <sup>-3</sup>  |
|                               |            | cubic       | 0.66                  |
| Left primary somatosensory    | 1          | linear      |                       |
|                               |            | quadratic   | 1.08                  |
| Right posterior parietal      | 4          | linear      |                       |
|                               |            | quadratic   | 1.13x10 <sup>-4</sup> |
| Left posterior parietal       | 2          | linear      |                       |
|                               |            | quadratic * | 46057.12              |
| Right primary visual          | 2          | linear      |                       |
|                               |            | quadratic   | 1.28                  |
|                               |            | cubic       | 3.0x10 <sup>-3</sup>  |

220

221 **TABLE 2. Selection between linear and non-linear models among different doses of ketamine**  
 222 **for each cortex.** Mixed effects models were formulated for each cortex including the cat as a  
 223 random effect when applicable. Bayes Factors (BF) were used to decide between quadratic (U-  
 224 shaped), cubic and linear fits. Clear evidence towards a quadratic fit was found for right

225 dorsolateral and rostral prefrontal cortices, right primary auditory cortex and left posterior parietal  
226 cortex. The asterisks indicate substantial evidence for a quadratic fit ( $BF > 5$ ).

227

228

229 Finally, in order to show the possible inter-areal differential effects of ketamine and dependencies  
230 to LZ in basal conditions among cortices, we studied both the baseline variance and its change per  
231 area. To study the basal conditions among cortices we built a linear mixed effect model including  
232 cats and sessions as random effects, and cortex as fixed effect and that model is statistically reliable  
233 ( $BIC = -15175$ ) when contrasted against a null model ( $BIC = -12941$ ;  $p < 0.01$ ) indicating that LZ  
234 vary among cortices. We further show that the effect of ketamine does not seem to be dependent  
235 on the LZ in basal conditions in wakefulness (see Supplementary Figure 1). When looking into  
236 wakefulness and light sleep the effects in LZ were all in the same direction and comparable in  
237 intensity independently of the baselines variability. It seems that basal LZ does not predict whether  
238 the LZ increases or decreases with drug. Finally, an interesting exploratory finding showed higher  
239 baseline LZ for right parietal cortices when compared to left side ones ( $p < 0.01$ ;  $BF = 3.3 \times 10^{16}$ ),  
240 but not strong enough for primary somatosensory and primary visual.

241

242

243

#### 244 *Informational complexity is not modulated by auditory stimuli under ketamine*

245

246 In 3 cats, modulation by auditory stimuli was studied. Under control conditions without ketamine,  
247 an increase in LZ was observed during stimulation in dorsolateral prefrontal ( $0.66 \pm 0.04$  to  
248  $0.70 \pm 0.007$ ,  $p < 0.01$ ,  $\eta^2 = 0.044$ ,  $BF = 10619.07$ ) and auditory ( $0.63 \pm 0.05$  to  $0.66 \pm 0.007$ ,  $p <$   
249  $0.01$ ,  $\eta^2 = 0.035$ ,  $BF = 75.27$ ) cortices, whereas the effect on other cortices studied were non-  
250 reliable, including right posterior parietal cortex ( $0.53 \pm 0.02$  to  $0.53 \pm 0.001$ ,  $p < 0.01$ ,  $\eta^2 = 0.008$ ,  
251  $BF = 7.0 \times 10^{-5}$ ), right somatosensory cortex ( $0.62 \pm 0.05$  vs  $0.62 \pm 0.002$  with  $p = 0.61$ ,  $\eta^2 = 0.005$ ,  
252  $BF = 1.0 \times 10^{-4}$ ), left somatosensory cortex ( $0.52 \pm 0.005$  vs  $0.53 \pm 0.002$  with  $p < 0.01$ ,  $\eta^2 = 0.002$ ,  
253  $BF = 0.09$ ), and left posterior parietal cortex ( $0.47 \pm 0.01$  vs  $0.48 \pm 0.001$ ,  $p = 0.85$ ,  $\eta^2 = 0.001$ ,  $BF$   
254  $= 1.0 \times 10^{-4}$ , Figure 4A).

255

256 Initially we hypothesized that the increment in complexity under the sensory stimulation versus  
257 non-stimulation conditions would be more evident under the effect of ketamine. However, there  
258 was no interaction between stimulation and ketamine. For left somatosensory cortex, non-reliable  
259 effect was observed during basal conditions in response to the stimuli ( $p = 3 \times 10^{-4}$ ,  $BF = 0.09$ ), as  
260 well as evidence for no interaction between dose and stimuli ( $p = 0.16$ ;  $BF = 3.5 \times 10^{-4}$ , Figure 4B).  
261 For right somatosensory cortex, where non-reliable increase was evidenced in control conditions  
262 (Figure 4A), no reliable interaction was found during ketamine effect ( $p = 2.0 \times 10^{-3}$ ;  $BF = 0.012$ )  
263 with no response to the stimuli ( $p = 0.64$ ;  $BF = 1.5 \times 10^{-4}$ ; Figure 4C). For the prefrontal cortex,  
264 where an increase was observed in control conditions, the same effect was found under ketamine  
265 ( $p = 9.4 \times 10^{-8}$ ;  $BF = 335.92$ ), with non-reliable interaction between stimuli and ketamine ( $p = 0.51$ ;  
266  $BF = 2.5 \times 10^{-8}$ ; Fig. 4D). For left posterior parietal cortex, non-reliable effect was found under  
267 baseline conditions, there was no effect of stimulation under ketamine ( $p = 0.85$ ;  $BF = 1.2 \times 10^{-4}$ ),  
268 and the interaction also remained unchanged under ketamine ( $p = 0.74$ ;  $BF = 2.5 \times 10^{-6}$ ; Figure 4E).  
269 Finally, for right posterior parietal cortex, no effect was found under basal conditions, there was  
270 no change with the stimuli under ketamine ( $p = 0.46$ ;  $BF = 7.4 \times 10^{-5}$ ), and the modulation by  
271 stimulation was non-reliable ( $p = 8 \times 10^{-3}$ ;  $BF = 8 \times 10^{-3}$ ; Figure 4F).

272

273

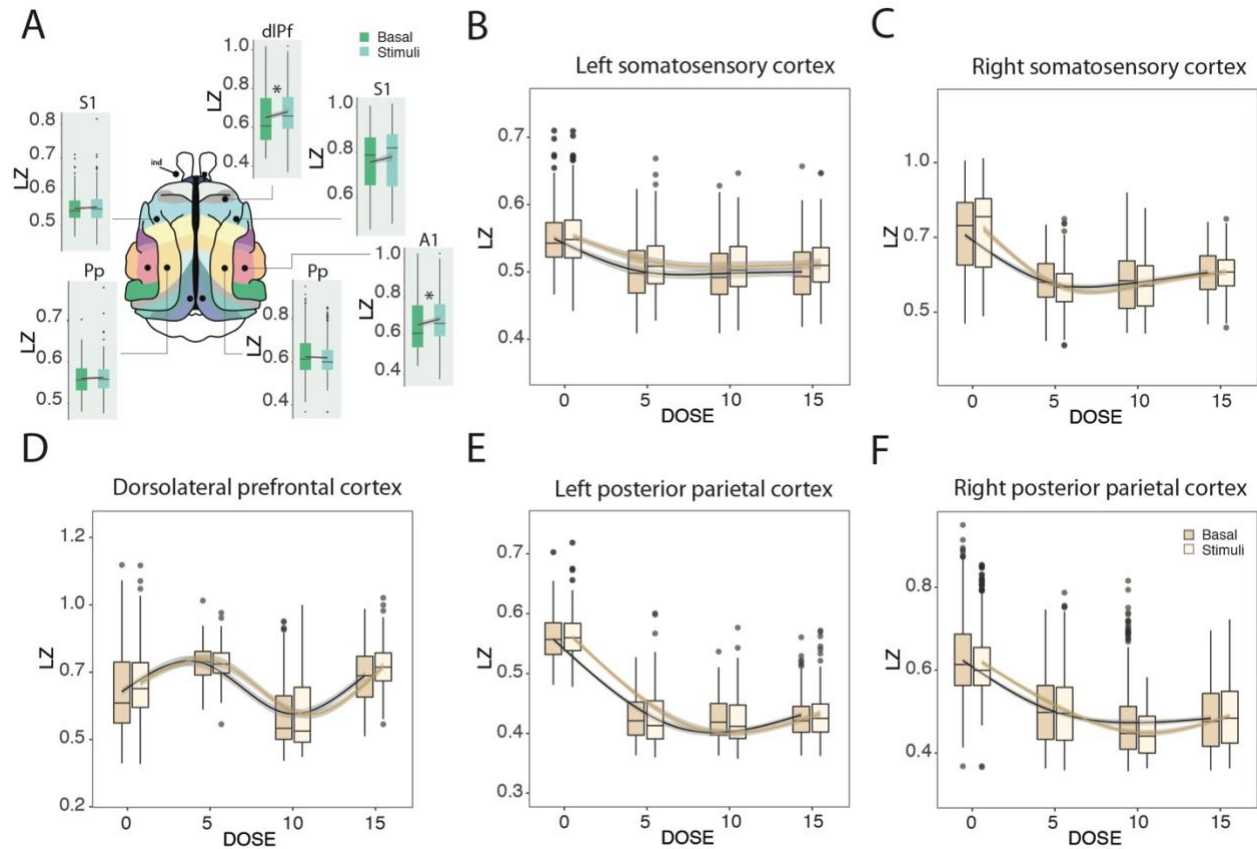

274

275

276

277 **FIGURE 4. Modulation of LZ by auditory stimulation.** (A) The effect of stimulation was shown  
278 without ketamine where an increase in LZ was observed during stimulation in dorsolateral  
279 prefrontal and auditory cortices. \* Statistically reliable ( $p < 0.01$ ;  $BF > 5$ ). dIPf = dorsolateral  
280 prefrontal cortex; Pp = posterior parietal cortex; S1= primary somatosensory cortex; A1= primary  
281 auditory cortex. (B-F) Modulation by stimulation under the effect of ketamine in 5, 10 and 15  
282 mg/Kg doses. No stimulation by dose interaction was observed. The doses are represented in  
283 mg/Kg.

284

285

## 286 Discussion

287

288 In this work, using LZ as a measure of dynamical complexity on direct intracranial recordings, we  
289 studied the effect of subanesthetic doses of ketamine in a dose-dependent manner. Ketamine

290 elicited a diverse set of dynamics, with the lower doses showing the most variable effects. For  
291 prefrontal and auditory cortices an increase in LZ was observed from low to medium ketamine  
292 dose. However, a decrease was evidenced at the maximum dose, drawing an inverted U-shape  
293 dose-effect curve, whereas the opposite effect was observed for other cortices including  
294 somatosensory and posterior parietal cortices, where an initial decrease was followed by an  
295 increase in complexity at higher doses. Additionally, we also presented auditory stimulation to the  
296 cats, which elicited an increase in LZ in prefrontal and auditory cortices, but this effect was not  
297 modulated by ketamine. Finally, in the same animals, we studied LZ during sleep, which by  
298 contrast show an homogeneous pattern among cortices. We demonstrate that informational  
299 complexity in the cortex of the cat decreases in light and deep sleep compared to awake states and  
300 REM. The same effect was observed in the geniculate nucleus of the thalamus, but as it was tested  
301 in only one animal and hence more evidence is required to see convergence in subcortical  
302 structures. For most of the cortex, there is only marginal complexity difference between  
303 wakefulness and REM sleep. The results were consistent among cats and similar for all the cortices  
304 studied and, more importantly, confirm previous results in humans and rats.

305  
306 As measures of neural signal diversity are known to be sensitive to conscious level in natural state  
307 changes (the sleep-wake cycle), they are also sensitive to the changes in brain dynamics associated  
308 with psychedelic and anesthetic states. Specifically, Schartner et al. found increased global neural  
309 signal diversity for the psychedelic state induced by ketamine, psilocybin and LSD, as compared  
310 to placebo, across a range of measures (Schartner et al., 2017). Other recent MEG and EEG studies  
311 have also demonstrated elevated signal diversity induced by canonical serotonergic psychedelics  
312 and ketamine (Tagliazucchi et al., 2014; Timmermann et al., 2019).

313  
314 From the perspective of its effects on EEG signal diversity, the dissociative NMDA-antagonist  
315 ketamine diverges from traditional anesthetics at subanesthetic concentrations, as it induces  
316 dissociative states characterized by a maintained or enhanced repertoire of brain states (Li &  
317 Mashour, 2019; Schartner et al., 2017). This is in contrast to GABAergic anesthetics such as  
318 propofol, which have been shown to degrade sensory integration and attenuate neural signal  
319 diversity in a dose-dependent manner (Ferenets et al., 2006, 2007; Ishizawa et al., 2016). While  
320 those studies were based on EEG signals that had been low-pass filtered at 55 Hz and lacked



321 cortical dynamics in higher gamma frequencies, Pal et al. (2020) have recently demonstrated that  
322 this part of the signal is important. Using intracranial EEG data from frontal and parietal cortices  
323 of rats receiving ketamine or propofol anesthesia, they demonstrated a reduction in broadband  
324 (0.5–175 Hz) EEG complexity during ketamine anesthesia that is comparable to that induced by  
325 the GABAergic anesthetic propofol. Bandwidth-specific analyses restricted to higher gamma  
326 frequencies showed that ketamine anesthesia is distinguished from propofol by suppression of  
327 EEG complexity in high gamma frequencies in the range of 65–175 Hz, which previous human  
328 studies using scalp EEG could not reveal (Pal et al., 2020). In the present study, by using  
329 intracranial electrodes in cats, we were able to study broadband (>0.5Hz) signal complexity .

330

331 Contrary to the apparent convergence of psychedelics (LSD, N,N-Dimethyltryptamine or DMT,  
332 psilocybin) reported (Schartner et al., 2017), some of us (González et al., 2021) have shown that  
333 the effects of ibogaine, a psychedelic alkaloid, induces high gamma power but are less coherent  
334 and less complex than control condition, and similar to natural REM sleep. Although some  
335 differences in the complexity measure or animal model may explain the difference, it is key to  
336 highlight that the ibogaine local complexity patterns were more consistent than those found in the  
337 current study, pointing to a different mode of action between alkaloid, serotonergic and N-  
338 methyl-D-aspartate (NMDA) psychedelics.

339

340 Ketamine's primary mechanism of action is as an NMDA antagonist whose receptors are located  
341 quite ubiquitously across the cerebral cortex, as well as subcortically (Conti et al., 1994; Huntley  
342 et al., 1994). A differential interaction with various subtypes of NMDA receptors could explain  
343 the heterogeneity in cortical response under the effects of ketamine (Zanos et al., 2018). However,  
344 the non-NMDA receptor effects of ketamine cannot be discounted, in particular its interactions  
345 with opioid receptors and hyperpolarization-activated cyclic nucleotide-gated (HCN) channels  
346 (Chen et al., 2009; Zanos et al., 2018; Zhou et al., 2013). Additionally, ketamine may indirectly  
347 exert effects through its interaction with other circuits. Previous work reported that subanesthetic  
348 doses of ketamine increased the release of not only 5-hydroxytryptamine (5-HT) (Amargós-Bosch  
349 et al., 2006; López-Gil et al., 2012, 2019), but also noradrenaline (Lorrain et al., 2003) as well as  
350 glutamate (Moghaddam et al., 1997) in the medial prefrontal cortex, which may increase signal  
351 complexity. At the receptor level, ketamine blocks excitatory NMDA receptors on fast-spiking

352 cortical interneurons more effectively than those on pyramidal neurons. This results in down-  
353 regulation of interneuron activity, and decreased gamma aminobutyric acid (GABA) release at the  
354 interneuron-pyramidal neuron synapse (Homayoun & Moghaddam, 2007; Seamans, 2008). This  
355 decrease in inhibitory tone (decreased GABA release) results in markedly excited pyramidal  
356 neurons. It has been proposed that this may explain why ketamine is associated with increased  
357 cerebral glucose utilization and blood flow (Langsjo et al., 2005; Långsjö et al., 2004), and  
358 increased EEG gamma oscillations (Blain-Moraes et al., 2014; Castro-Zaballa et al., 2019; Ferrer-  
359 Allado et al., 1973; Lee et al., 2013; Schwartz et al., 1974) and may also help us understand the  
360 changes observed in the complexity of the signal. However, our results show a decrease of LZ in  
361 somatosensory and posterior parietal cortices after the lowest dose of ketamine (Figure 3B). As  
362 both of these cortices process somatosensory information, our results may be due to a reduction in  
363 the somatosensory information influx, as one of the main effects of subanesthetic doses of  
364 ketamine is analgesia (Zanos et al., 2018).

365  
366 A further possible outcome for subanesthetic doses of ketamine effects that we did not find  
367 evidence for is the increased locomotion, as found in rats (Hetzler & Wautlet, 1985). An increase  
368 in complexity compared to baseline was found for prefrontal and motor cortices, thus, a connection  
369 between this regional increase of LZ complexity and putative increased motor activity could be  
370 proposed as a possible explanation, however, as reported in our previous publication using the  
371 same dataset (Castro-Zaballa et al., 2019), the cats retained muscular tone but hyperlocomotion  
372 was not observed in our experiments, nor in previous studies in cats (Ambros & Duke, 2013;  
373 Issabeagloo et al., 2011).

374  
375 The ongoing discussion about complexity as proxy to study integration in different consciousness  
376 states oscillates between perturbational and steady state studies. In a perturbational -  
377 complementary- study, Arena et al, (2021) quantified the complexity of electrocorticographic  
378 responses to intracranial electrical stimulation in rats, comparing wakefulness to propofol,  
379 sevoflurane, and ketamine anesthesia using PCI and PCI state-transition (PCI<sup>ST</sup>) (Comolatti et al.,  
380 2019). They found ketamine-induced evoked related potentials (ERPs) mixed features with a brief  
381 response followed by an OFF period (albeit long-lasting deterministic activations in half of the  
382 animals), and the duration of the resulting phase-locked response was close to that of wakefulness.

383 The time course of PCI<sup>ST</sup> revealed similarities to wakefulness, but resulted in an overall reduction  
384 of complexity. These results from a perturbational study showed a similar feature to our “state”  
385 study in that the ketamine induced effects are cortically variable and not consistent between  
386 animals. It is, however, difficult to compare this study directly to our results because we used  
387 subanesthetic doses of ketamine (5, 10 and 15 mg/Kg), whereas Arena et al., 2021 used anesthetic  
388 doses of ketamine (30 mg/kg), so our hypotheses of higher complexity with low doses cannot be  
389 addressed in their study. On the other hand, they explored the effect of perturbational complexity  
390 index (PCI) which is an electrophysiological metric for the capacity of cortical circuits to integrate  
391 information, whereas we studied the effect of auditory stimulation on the naturally occurring and  
392 ongoing cortical complexity and hence the complementarity of the findings should be encouraging  
393 for the field (Arena et al., 2021).

394

395 Neural diversity, assessed by LZ, is an attractive measure because of simplicity, practical  
396 applicability, and consistency with both complexity-based (Tononi et al., 2016; Tononi &  
397 Edelman, 1998) and entropy-based (Carhart-Harris, 2018; Carhart-Harris et al., 2014) theories of  
398 neural integration and consciousness. The measure is also useful in questions regarding local  
399 processing as it is computed at the electrode level, thus was able to demonstrate differential effects  
400 in distinct thalamic and cortical brain regions. Indeed, according to the dynamic core hypothesis  
401 (Tononi & Edelman, 1998) and subsequent theoretical developments such as Information  
402 Integration Theory (Tononi et al., 2016), only certain distributed subsets of the neuronal groups  
403 that are activated or deactivated in response to a given task are associated with conscious  
404 experience, therefore a large cluster of neuronal groups that together constitute, on a time scale of  
405 hundreds of milliseconds, a unified neural process of high complexity can be termed the “dynamic  
406 core”. In line with this idea, our results could be interpreted as the prefrontal and auditory cortices,  
407 where an increase in LZ was observed under the 5mg dose of ketamine, constituting a part of the  
408 “dynamic core”, and somatosensory and posterior parietal cortices playing a different role in neural  
409 integration. However our results do not necessarily provide strong evidence for the “dynamic core”  
410 over other theoretical interpretations such the entropic brain (Carhart-Harris, 2018) or other  
411 complexity and consciousness (Sarasso et al., 2021). Since the predictions from most frameworks  
412 are less precise and hardly define the specific pattern of results we present. Furthermore, there are  
413 complementary approaches to understand information and complexity dynamics, both using state

414 and perturbational experimental and analyses models and frameworks that illustrate the  
415 underdeveloped integration of the theories and experiments in this subdiscipline. Another  
416 interpretation of the overall ketamine dose-response results, its variance and dynamics, is that it  
417 could reflect a level of connection to the external environment interacting with the  
418 pharmacological modulation. We however did not systematically assess this behavioral aspect and  
419 hence it is difficult to draw conclusions at that level.

420

421 Another useful framework for understanding these results is the neuroscience of arousal, including  
422 wakefulness, sleep, circadian rhythms, responsiveness and alertness (Bekinschtein et al., 2009;  
423 Brown et al., 2011). Sleep shows a clear change in arousal throughout the day cycle; the intensity  
424 of the stimuli needed to wake up a person is maximal in deep sleep and lower in light sleep and  
425 REM. This pattern partially mimics the results obtained for informational complexity in this study  
426 using electrocorticogram recordings (ECoG), and several other nonlinear measures such as fractal  
427 dimension and other entropy methods (Ma et al., 2018), but not to other measures such as power  
428 in different bands and connectivity methods. This finding allows us to interpret that LZ may index  
429 behaviorally defined wakefulness, or arousability by stimuli (Bonnet et al., 1978). Although  
430 ketamine is used as an anesthetic and creates unconsciousness in high doses and hence can be  
431 framed in terms of consciousness as wakefulness and arousal, the effects at lower doses require a  
432 multidimensional framework, able to accommodate neurological symptoms (dizziness, slurred  
433 speech), mood modulations, and psychedelic experiences. In principle, if ketamine had the classic  
434 profile of a sedative, responsiveness would monotonically decrease (Brown et al., 2011) and a  
435 similar profile would be expected for molecular and neural measures. However, ketamine has an  
436 interesting profile as it belongs to a group of hypnotics that show hallucinatory capacities and an  
437 hormetic or U-shaped curve (Calabrese & Baldwin, 2001) in EEG and blood flow (Cavazzuti et  
438 al., 1987; Tsuda et al., 2007). The hormesis of the dose response allows for the comparison of not  
439 only conscious level in the sense of wakefulness but in terms of contents of consciousness in low  
440 ketamine and REM sleep. From humans we know that the likelihood of increased richness in  
441 mental content during the sleep-wake cycle occurs during REM (Windt & Noreika, 2011) after a  
442 decrease in NREM (U-shaped); and we know that the richness of mental content, including  
443 hallucinations, peaks early with ketamine before decreasing into sedation and anesthesia (Powers  
444 et al., 2015) (an inverted U-shaped curve). In both cases the higher levels of content agree with the

445 higher (or recovering) levels of informational complexity as measured by LZ (Abásolo et al., 2015;  
446 Mateos et al., 2018; Schartner et al., 2015; Schartner, Carhart-Harris, et al., 2017; Schartner,  
447 Pigorini, et al., 2017). In this study, we compare the consistency of the complexity in the cortex in  
448 sleep and the diversity in the ketamine challenge as two putatively very different mechanisms of  
449 reaching a higher level of content in consciousness.

450

451 Recent findings by Mediano et al. (2020) provide strong quantitative evidence on how  
452 environmental conditions have a substantial influence on neural dynamics during a psychedelic  
453 experience in humans. This work showed how brain entropy is modulated by stimulus  
454 manipulation during a psychedelic experience by studying participants under the effects of LSD  
455 or placebo, either with gross state changes (eyes closed vs. open) or different stimuli (no stimulus  
456 vs. music vs. video). Results showed that while brain entropy increased with LSD in all the  
457 experimental conditions, it exhibited largest changes when subjects have their eyes closed,  
458 whereas the entropy enhancing effects of LSD were less marked when participants opened their  
459 eyes or perceived external stimuli — such as music or video (Mediano et al., 2020). In the present  
460 work, we studied the modulation of auditory stimulation on brain complexity in basal conditions  
461 and under increasing doses of ketamine in 3 cats using ECoG recordings with the hypothesis of  
462 observing a higher level of complexity under stimulation. However, only a slight increase in LZ  
463 was evidenced during stimulation in dorsolateral prefrontal and auditory cortices, whereas a  
464 complete lack of or very weak effect were found in the other cortices studied (Figure 4). This weak  
465 effect may be explained by the low relevance of the stimulus, as it failed to catch the attention of  
466 the animals, compared to extremely salient or meaningful stimuli such as music or video. Further  
467 evidence that stimulation studies should exploit more complex stimuli also comes from a recent  
468 study where TMS pulses also failed to increase complexity in low doses of ketamine in humans  
469 (Farnes et al., 2020). Furthermore, Nilsen and collaborators (Nilsen et al., 2019) were unable to  
470 demonstrate an influence of attention in LZ complexity after stimulation while we have reported  
471 (Mediano et al., 2020) that LZ is modulated when applying different types of stimulation (music  
472 and videos). Additionally, we have recently shown (Mediano et al., 2021) that LZ varies with the  
473 level of alertness and also depending on the task, not being restricted to measure the level of  
474 consciousness but cognitive and attentional demands.

475 New experiments using more appropriate stimuli in terms of relevance and salience are needed to  
476 better address this hypothesis and further the experimental understanding neural dynamics of  
477 information theory, complexity and entropy as the system is modulated pharmacologically.

478  
479 Our sleep results are consistent with previous results in humans (Andrillon et al., 2016; M.  
480 Schartner et al., 2017), as well as in rats (Abasolo et al., 2015). However, a closer read shows some  
481 differences: Andrillon et al. (2016) reported a small but reliable decrease in LZ during REM sleep  
482 compared to the waking state, possibly due to participants engaged in a task during the waking  
483 state, whereas the participants in the Schartner et al. study were simply at rest with eyes closed and  
484 not engaged or externally driven by task or stimuli. In our study the animals were also at rest but  
485 with eyes open and showed a decrease in LZ during LS and further decrease in SWS, which was  
486 similar for all cortices (Figure 2A) in line with previous findings (Andrillon et al., 2016; M.  
487 Schartner et al., 2017). However, a greater variability was evident for REM sleep state where in  
488 some cortices LZ was equal in level of complexity to wakefulness whereas in others it was similar  
489 to LS or to SWS (Figure 2B). The complexity pattern among sleep stages observed in the cortex  
490 was also evidenced in the lateral geniculate nucleus (Figure 2A), lending clear convergent  
491 evidence to the common effects of informational complexity in the brain beyond the cortex for the  
492 sleep wake cycle.

493  
494 In summary, our data demonstrate that there is a dose-dependent ketamine effect on neural  
495 complexity. An increase in complexity compared to baseline was found for some cortices  
496 (prefrontal, motor, auditory and visual) only in the lowest doses, while the higher dose frequently  
497 showed the lowest informational complexity. However, a decrease in complexity was also seen in  
498 somatosensory and posterior parietal cortex in the low doses. The heterogeneity of the ketamine  
499 effects between cats and cortices contrasts with the homogeneity of the changes in complexity seen  
500 for different stages of sleep, further highlighting the differences between natural and  
501 pharmacologically induced changes in consciousness. The individual and cortical variability in the  
502 neural complexity dynamics revealed by ketamine highlights the intricacy of the brain when  
503 altered by dissociatives and psychedelics, pushing for a multidimensional framework beyond  
504 simple arousal and alertness parameters to characterize the change in the states of consciousness  
505 from a neuropharmacological perspective.

506

## 507 **Methods**

508

### 509 *Animals*

510

511 Five adult cats were used in this study; all of whom were also utilized in a previous report (Castro-  
512 Zaballa et al., 2019). The animals were obtained from and determined to be in good health by the  
513 Institutional Animal Care Facility of the Faculty of Medicine (University of the Republic,  
514 Uruguay). All experimental procedures were conducted in accordance with the Guide for the Care  
515 and Use of Laboratory Animals (8th edition, National Academy Press, Washington DC, 2011) and  
516 were approved by Institutional and National Animal Care Commissions of the University of the  
517 Republic in Uruguay (Protocol N° 070153000089-17). Adequate measures were taken to minimize  
518 pain, discomfort or stress to the animals. In addition, all efforts were made to use the minimum  
519 number of animals necessary to produce reliable scientific data.

520

### 521 *Surgical procedure*

522

523 Following general anesthesia, the head was positioned in a stereotaxic frame and the skull was  
524 exposed. Stainless steel screw electrodes (1.4 mm diameter) were placed on the surface (above the  
525 dura matter) of different cortical areas including prefrontal, primary motor, primary somatosensory  
526 and posterior parietal cortices. Note that because the animals were not prepared specifically for  
527 this work, we did not analyze the same cortices in all of them. The electrodes were connected to a  
528 Winchester plug, which together with two plastic tubes were bonded to the skull with acrylic  
529 cement in order to maintain the animals' head in fixed position without pain or pressure. After  
530 recovery from surgical procedures, they were adapted to the recording environment for a period  
531 of at least 2 weeks.

532

### 533 *Data acquisition and preprocessing*

534

535 Experimental sessions of 4 h were conducted between 11 a.m. and 3 p.m. in a temperature-  
536 controlled environment (21–23 °C). During these sessions (as well as during the adaptation

537 sessions), the animals' head was held in a stereotaxic position by four steel bars that were placed  
538 into the chronically implanted plastic tubes, while the body rested in a sleeping bag (semi-restricted  
539 condition).

540

541 The ECoG activity was recorded with a monopolar (referential) configuration, utilizing a common  
542 reference electrode located in the left frontal sinus. The experiments on sleep and ketamine were  
543 performed on the same cats but not the same cortices were recorded as they were originally  
544 designed for different studies. The electromyogram (EMG) of the nuchal muscles, which was  
545 recorded by means of an acutely placed bipolar electrode, was also monitored. The  
546 electrocardiogram (ECG), by electrodes acutely placed on the skin over the pre-cordial region, and  
547 respiratory activity by means of a micro-effort piezo crystal infant sensor were also recorded. Each  
548 cat was recorded daily for ~30 days in order to obtain complete basal and treatment data sets. The  
549 animal retained muscular tone but hyperlocomotion was not observed in our experiments (Castro  
550 et al., 2019), nor in previous studies in cats (Issabeagloo et al., 2011), an increase in motor activity  
551 was also absent in semi-restricted condition, and ~5 min following the injection of ketamine the  
552 animals lay down on the floor unable to stand up (i.e., an ataxia-like effect), but responded to sound  
553 stimulus directing the gaze toward the sound source. In the absence of stimuli, the cats moved their  
554 head from one side to the other (i.e., a head-weaving-like behavior, described in rodents, and  
555 defined as stereotypies characterized as lateral side-to-side movement of the head without  
556 locomotion).

557

558 Bioelectric signals were amplified ( $\times 1,000$ ), filtered (0.1 - 500 Hz), sampled (1,024 Hz,  $2^{16}$  bits)  
559 and stored in a PC using the Spike 2 software (Cambridge Electronic Design).

560

561 Data were obtained after ketamine administration as well as during spontaneously occurring quiet  
562 W, LS, NREM sleep and REM sleep (Fig. 1). Five, 10, and 15 mg/kg i.m. of ketamine (Ketonal  
563 ®, Richmond Veterinaria S.A.) were administered to five animals in 4 different sessions. These  
564 three doses were administered in each animal in different experimental sessions performed in  
565 different days in a counterbalanced order. The scheme illustrated in figure 1B corresponds to one  
566 session, in which only one bolus of ketamine was administered. In each session, the animal was  
567 recorded in resting conditions for around 30 minutes and then the bolus of ketamine was injected.



568 After that, the recording continued for 4 hours. Ten minutes after the injection the cat received  
569 auditory stimulation (in 3 of the 5 cats). The different doses of ketamine were administered in  
570 different days leaving 3 or 4 days in between. Additionally, each different dose was repeated 4  
571 times. In each session the whole experiment illustrated in figure 1B was repeated, therefore in total  
572 the experiments were repeated 12 times (4 per dose). Ketamine (50 mg/ml) was diluted in  
573 benzethonium chloride, hydrochloric acid, and water (solution for veterinary use). Basal  
574 recordings (without injections) were used as control. Sound stimuli were introduced ~30 min after  
575 the beginning of the recording sessions in drug-free condition, and 10 min after ketamine injection.  
576 These sound stimuli had the same characteristics as those used to induce active W (Castro et al.,  
577 2013). Sound stimuli was presented for a period of 300 s, and consisted of 60-100 dB SPL clicks,  
578 with variable frequency of presentation (1–500 Hz), modified at random in order to avoid  
579 habituation (Castro et al., 2013; Torterolo et al., 2003). The mentioned frequency refers to the  
580 frequency of presentation of the clicks and not the sound frequency. There were no frequency  
581 steps, and the SPL had no steps. Sound stimuli during 300 s were also performed 10 min after  
582 ketamine injection in three cats. The stimuli were square pulses produced with an electric  
583 stimulator connected to a speaker which emit them as clicks.

584

585 For preprocessing, sleep stages were scored off-line by visual inspection of 5-s epochs in Spike2  
586 software, where the ECoG and electromyogram (EMG) were displayed simultaneously. In order  
587 to analyze LZs during sleep, a total of 300 artifact-free seconds data were selected from each  
588 behavioral state. Additionally, to study LZs during the Ketamine effect 300 s duration segments,  
589 with and without stimulation, were selected before and after ketamine administration.

590

591 After scoring, for both experiments, the selected epochs were exported to matlab for further  
592 preprocessing. The Matlab toolbox eeglab was used to filter the data (0.5-200 Hz band-pass). Each  
593 epoch was visually inspected, and those with gross artifacts (e.g. movements) were removed from  
594 the analysis.

595

596 ***Lempel-Ziv complexity***

597

598 In this study we used Lempel-Ziv (LZ) complexity to compute the complexity of measured neural  
599 signals (Lempel & Ziv, 1976). In particular, we used the LZ78 algorithm (Ziv & Lempel, 1978),  
600 which corresponds to the standard word-dictionary implementation: given a binary string, the  
601 algorithm scans it sequentially looking for distinct structures or “patterns.” The more diverse the  
602 binary string, the more patterns are included in the dictionary (a sequence containing only zeros or  
603 only ones would lead to the minimal number of patterns being obtained). The total number of these  
604 patterns is a measure of signal diversity.

605  
606 To compute LZ from our experimental data, the recording of each channel was split into segments  
607 of 5120 samples (5s sampled at 1024Hz). Then, to generate a discrete sequence from a real-valued  
608 signal  $X$  of length  $T$ ,  $X$  is detrended and binarized with a threshold of 0, and the resulting binary  
609 sequence is fed to the LZ78 algorithm. Finally, the resulting dictionary length  $L$  is normalized as  
610

$$C = \frac{\log_2 L}{T} L$$

611  
612  
613 to yield a measure of complexity  $C$ .

614  
615 Our choice on binarizing signals with a threshold of zero was driven by two factors: 1) LZ and  
616 related methods tend to be remarkably robust to the choice of discretisation procedure and number  
617 of bins (see e.g. discussion in Mediano (2020)); and 2) the Hilbert transform of a very broadband  
618 signal isn't easily interpretable, and to create a meaningful analytic signal it would be necessary to  
619 bandpass-filter the data in a particular frequency band of interest. Given these two arguments, we  
620 reasoned that the added analysis complexity introduced by the filter parameters, frequency bands,  
621 etc, would not lead to substantially richer or more accurate results, and thus opted for the simple  
622 (yet probably effective) methodology.

623  
624  
625 *Statistics*  
626

627 One way ANOVA, with Tukey post-hoc test were used to compare LZ between sleep stages per  
628 cortex per animal (Fig. 2B) where Cohen's d was used to address the size of the effect.  
629 Additionally, a multilevel approach as well as Bayesian Informational Criterion (BIC) were used  
630 to find the most likely explanatory model within the hierarchical model in the group statistical  
631 analysis comparing linear, quadratic and cubic models. For sleep study, the state of sleep was used  
632 as a fixed effect and the cat identity as a random effect. The same type of approach was used to  
633 study the ketamine effect among different cortices under control and stimulus conditions. In this  
634 case the dose and stimulus (if present) were used as fixed effects; and cat identity and session as  
635 random effects. The interaction between stimuli and ketamine dose was also included in the model  
636 when studying the modulation by stimulus. All models were estimated via restricted maximum  
637 likelihood, using the open-source packages lme4 v.1.1-21 (Bates et al., 2015) and lmerTest v.3.1-  
638 1 (Kuznetsova et al., 2017) on R v.3.6.1.

639

#### 640 **Data and materials availability**

641

642 The code for computation of LZ used for analysis is available in GitHub at the following link:  
643 <https://gitlab.com/CPasco83/sleep-and-ketamine>. Data is available upon reasonable request to the  
644 authors.

645

#### 646 **Authors' Contribution**

647

648 P.T. and T.B. designed the study. C.Z.S. and P.T. performed the experiments and collected the  
649 data. C.P. and P.M. analyzed data; M.P. and P.M. wrote LZ codes; C.P. wrote the manuscript; all  
650 authors participated in the interpretation of results and revision of the manuscript, and approved  
651 the final version of the manuscript. P.T., T.B. and D.B. provided the financial support.

652

#### 653 **Acknowledgements**

654

655 This study was supported by the "Programa de Desarrollo de Ciencias Básicas, PEDECIBA" and  
656 the "Comisión Sectorial de Investigación Científica" (CSIC) I + D-2020-393 grant from Uruguay.  
657 PAM and DB are funded by the Wellcome Trust (grant no. 210920/Z/18/Z).

658

659 **Conflict of interests**

660

661 The authors have declared that no conflict of interests exist.

662

663 **Abbreviations**

664

665 BIC: Bayesian information criterion

666 BF: Bayes Factors

667 DMT: N,N-Dimethyltryptamine

668 ECG: Electrocardiogram

669 ECoG: Electrocorticogram

670 EEG: Electroencephalography

671 EMG: Electromyogram

672 ERPs: Evoked related potentials

673 GABA: Gamma aminobutyric acid

674 HCN channels: Hyperpolarization-activated cyclic nucleotide-gated channels

675 LS: Light sleep

676 LSD: Lysergic acid diethylamide

677 LZ: Lempel Ziv complexity

678 NMDA: N-methyl-D-aspartate

679 NREM: Non-rapid eyes movement

680 PCI: Perturbational complexity index

681 PCI<sup>ST</sup>: PCI state-transition

682 REM: Rapid eye movements

683 SWS: Slow wave sleep

684 TMS: Transcranial magnetic stimulation

685 5-HT: 5-hydroxytryptamine

686

687

688 **References**

689

- 690 Abásolo, D., Simons, S., Morgado da Silva, R., Tononi, G., & Vyazovskiy, V. V. (2015).  
691 Lempel-Ziv complexity of cortical activity during sleep and waking in rats. *Journal of*  
692 *Neurophysiology*, *113*(7), 2742–2752. <https://doi.org/10.1152/jn.00575.2014>
- 693 Amargós-Bosch, M., López-Gil, X., Artigas, F., & Adell, A. (2006). Clozapine and olanzapine,  
694 but not haloperidol, suppress serotonin efflux in the medial prefrontal cortex elicited by  
695 phencyclidine and ketamine. *International Journal of Neuropsychopharmacology*, *9*(5),  
696 565–573. <https://doi.org/10.1017/S1461145705005900>
- 697 Ambros, B., & Duke, T. (2013). Effect of low dose rate ketamine infusions on thermal and  
698 mechanical thresholds in conscious cats. *Veterinary Anaesthesia and Analgesia*, *40*, 76–82.  
699 <https://doi.org/10.1111/vaa.12057>
- 700 Andrillon, T., Poulsen, A. T., Hansen, L. K., L É Ger, D., & Kouider, S. (2016). Neural markers  
701 of responsiveness to the environment in human sleep. *Journal of Neuroscience*, *36*(24),  
702 6583–6596. <https://doi.org/10.1523/JNEUROSCI.0902-16.2016>
- 703 Arena, A., Comolatti, R., Thon, S., Casali, A. G., & Storm, J. F. (2021). General anesthesia  
704 disrupts complex cortical dynamics in response to intracranial electrical stimulation in rats.  
705 *ENeuro*, *8*(4). <https://doi.org/10.1523/ENEURO.0343-20.2021>
- 706 Bates, D., Mächler, M., Bolker, B. M., & Walker, S. C. (2015). Fitting linear mixed-effects  
707 models using lme4. *Journal of Statistical Software*, *67*(1).  
708 <https://doi.org/10.18637/jss.v067.i01>
- 709 Bekinschtein, T., Cologan, V., Dahmen, B., & Golombek, D. (2009). You are only coming  
710 through in waves: wakefulness variability and assessment in patients with impaired  
711 consciousness. *Progress in Brain Research*, *177*, 171–189. [https://doi.org/10.1016/S0079-6123\(09\)17712-9](https://doi.org/10.1016/S0079-6123(09)17712-9)
- 713 Blain-Moraes, S., Lee, U., Ku, S., Noh, G., & Mashour, G. A. (2014). Electroencephalographic  
714 effects of ketamine on power, cross-frequency coupling, and connectivity in the alpha  
715 bandwidth. *Front Syst Neurosci.*, *8*, 114. <https://doi.org/10.3389/fnsys.2014.00114>
- 716 Bonnet, M., Hohson, L., & Webb, W. (1978). The reliability of arousal threshold during sleep.  
717 *Psychophysiology*, *15*(5), 412–416. <https://doi.org/10.1111/j.1469-8986.1978.tb01407.x>
- 718 Brown, E. N., Purdon, P. L., & Van Dort, C. J. (2011). General Anesthesia and Altered States of  
719 Arousal: A Systems Neuroscience Analysis. *Ann Rev Neurosci.*, *34*, 601–628.  
720 <https://doi.org/10.1146/annurev-neuro-060909-153200>

- 721 Calabrese, E. J., & Baldwin, L. A. (2001). Hormesis: A generalizable and unifying hypothesis.  
722 *Critical Reviews in Toxicology*, *31*(4–5), 353–424. <https://doi.org/10.1080/20014091111730>
- 723 Carhart-Harris, R. L., Kaelen, M., Bolstridge, M., Williams, T. M., Williams, L. T., Underwood,  
724 R., Feilding, A., & Nutt, D. J. (2016). The paradoxical psychological effects of lysergic acid  
725 diethylamide (LSD). *Psychological Medicine*, *46*(7), 1379–1390.  
726 <https://doi.org/10.1017/S0033291715002901>
- 727 Carhart-Harris, Robin L. (2018). The entropic brain - revisited. *Neuropharmacology*, *142*, 167–  
728 178. <https://doi.org/10.1016/j.neuropharm.2018.03.010>
- 729 Carhart-Harris, Robin L., Leech, R., Hellyer, P. J., Shanahan, M., Feilding, A., Tagliazucchi, E.,  
730 Chialvo, D. R., & Nutt, D. (2014). The entropic brain: A theory of conscious states  
731 informed by neuroimaging research with psychedelic drugs. *Frontiers in Human*  
732 *Neuroscience*, *8*(20), 1–22. <https://doi.org/10.3389/fnhum.2014.00020>
- 733 Casali, A. G., Gosseries, O., Rosanova, M., Boly, M., Sarasso, S., Casali, K. R., Casarotto, S.,  
734 Bruno, M. A., Laureys, S., Tononi, G., & Massimini, M. (2013). A theoretically based  
735 index of consciousness independent of sensory processing and behavior. *Science*  
736 *Translational Medicine*, *5*(198), 198ra105. <https://doi.org/10.1126/scitranslmed.3006294>
- 737 Castro-Zaballa, S., Cavelli, M. L., Gonzalez, J., Nardi, A. E., Machado, S., Scorza, C., &  
738 Torterolo, P. (2019). EEG 40 Hz coherence decreases in REM sleep and ketamine model of  
739 psychosis. *Frontiers in Psychiatry*, *10*, 1–14. <https://doi.org/10.3389/fpsy.2018.00766>
- 740 Castro, S., Falconi, A., Chase, M. H., & Torterolo, P. (2013). Coherent neocortical 40-Hz  
741 oscillations are not present during REM sleep. *European Journal of Neuroscience*, *37*(8),  
742 1330–1339. <https://doi.org/10.1111/ejn.12143>
- 743 Cavazzuti, M., Porro, C. A., Biral, G. P., Benassi, C., & Barbieri, G. C. (1987). *Ketamine effects*  
744 *on local cerebral blood flow and metabolism in the rat*. *7*, 806–811. [https://doi.org/DOI:  
745 10.1038/jcbfm.1987.138](https://doi.org/DOI:10.1038/jcbfm.1987.138)
- 746 Chen, X., Shu, S., & Bayliss, D. A. (2009). HCN1 channel subunits are a molecular substrate for  
747 hypnotic actions of ketamine. *Journal of Neuroscience*, *29*(3), 600–609.  
748 <https://doi.org/10.1523/JNEUROSCI.3481-08.2009>
- 749 Comolatti, R., Pigorini, A., Casarotto, S., Fecchio, M., Faria, G., Sarasso, S., Rosanova, M.,  
750 Gosseries, O., Boly, M., Bodart, O., Ledoux, D., Bricchant, J. F., Nobili, L., Laureys, S.,  
751 Tononi, G., Massimini, M., & Casali, A. G. (2019). A fast and general method to

- 752 empirically estimate the complexity of brain responses to transcranial and intracranial  
753 stimulations. *Brain Stimul.*, 12(5), 1280–1289. <https://doi.org/10.1016/j.brs.2019.05.013>.
- 754 Conti, F., Minelli, A., Molnar, M., & Brecha, N. C. (1994). Cellular localization and laminar  
755 distribution of NMDAR1 mRNA in the rat cerebral cortex. *Journal of Comparative*  
756 *Neurology*, 343(4), 554–565. <https://doi.org/10.1002/cne.903430406>
- 757 Farnes, N., Bjørn, E. J., Nilsen, A. S., Romundstad, L. G., & Storm, J. F. (2020). Increased signal  
758 diversity/complexity of spontaneous EEG, but not evoked EEG responses, in ketamine-  
759 induced psychedelic state in humans. *PLoS One*, 23.  
760 <https://doi.org/10.1371/journal.pone.0242056>
- 761 Ferenets, R., Lipping, T., Anier, A., Jäntti, V., Melto, S., & Hovilehto, S. (2006). Comparison of  
762 entropy and complexity measures for the assessment of depth of sedation. *IEEE*  
763 *Transactions on Biomedical Engineering*, 53(6), 1067–1077.  
764 <https://doi.org/10.1109/TBME.2006.873543>
- 765 Ferenets, R., Vanluchene, A., Lipping, T., & Heyse, B. (2007). Behavior of Entropy /  
766 Complexity Measures of the Electroencephalogram during Propofol-induced Sedation.  
767 *Anesthesiology*, 106(4), 696–706.
- 768 Ferrer-Allado, T., Brechner, V. L., Dymond, A., Cozen, H., & Crandall, P. (1973). Ketamine-  
769 induced electroconvulsive phenomena in the human limbic and thalamic regions.  
770 *Anesthesiology*, 38(4), 333–344.
- 771 González, J., Cavelli, M., Castro-Zaballa, S., Mondino, A., Tort, A. B. L., Rubido, N., Carrera,  
772 I., & Torterolo, P. (2021). EEG Gamma Band Alterations and REM-like Traits Underpin  
773 the Acute Effect of the Atypical Psychedelic Ibogaine in the Rat. *ACS Pharmacology and*  
774 *Translational Science*, 4(2), 517–525. <https://doi.org/10.1021/acspsci.0c00164>
- 775 González, J., Cavelli, M., Mondino, A., Pascovich, C., Castro-Zaballa, S., Torterolo, P., &  
776 Rubido, N. (2019). Decreased electrocortical temporal complexity distinguishes sleep from  
777 wakefulness. *Scientific Reports*, 9(1), 1–9. <https://doi.org/10.1038/s41598-019-54788-6>
- 778 Hetzler, B. E., & Wautlet, B. S. (1985). *Ketamine-Induced Locomotion in Rats in an Open-Field*.  
779 22, 653–655.
- 780 Homayoun, H., & Moghaddam, B. (2007). NMDA Receptor Hypofunction Produces Opposite  
781 Effects on Prefrontal Cortex Interneurons and Pyramidal Neurons. *J Neurosci.*, 27, 11496–  
782 11500. <https://doi.org/10.1523/JNEUROSCI.2213-07.2007>

- 783 Huntley, G. W., Vickers, J. C., Janssen, W., Brose, N., Heinemann, S. F., & Morrison, J. H.  
784 (1994). Distribution and synaptic localization of immunocytochemically identified NMDA  
785 receptor subunit proteins in sensory-motor and visual cortices of monkey and human.  
786 *Journal of Neuroscience*, *14*(6), 3603–3619. [https://doi.org/10.1523/jneurosci.14-06-](https://doi.org/10.1523/jneurosci.14-06-03603.1994)  
787 [03603.1994](https://doi.org/10.1523/jneurosci.14-06-03603.1994)
- 788 Ishizawa, Y., Ahmed, O. J., Patel, S. R., Gale, J. T., Sierra-Mercado, D., Brown, E. N., &  
789 Eskandar, E. N. (2016). Dynamics of propofol-induced loss of consciousness across primate  
790 neocortex. *Journal of Neuroscience*, *36*(29), 7718–7726.  
791 <https://doi.org/10.1523/JNEUROSCI.4577-15.2016>
- 792 Issabeagloo, E., Gharachorlou, A. A., & Ghalahkandi, J. G. (2011). Comparison of Sedative  
793 Effects of Oral Ketamine & Chlorpheniramine in the Manner. *Advances in Environmental*  
794 *Biology*, *5*(4), 784–789.
- 795 Kuznetsova, A., Brockhoff, P. B., & Christensen, R. H. B. (2017). lmerTest Package: Tests in  
796 Linear Mixed Effects Models . *Journal of Statistical Software*, *82*(13).  
797 <https://doi.org/10.18637/jss.v082.i13>
- 798 Langsjö, J. W., Maksimow, A., Salmi, E., Kaisti, K., Aalto, S., Oikonen, V., Hinkka, S., Aantaa,  
799 R., Sipilä, H., Viljanen, T., & Parkkola, R. (2005). S-ketamine anesthesia increases cerebral  
800 blood flow in excess of the metabolic needs in humans. *Anesthesiology*, *103*(2), 258–268.  
801 [http://ovidsp.ovid.com/ovidweb.cgi?T=JS&PAGE=reference&D=emed7&NEWS=N&AN=](http://ovidsp.ovid.com/ovidweb.cgi?T=JS&PAGE=reference&D=emed7&NEWS=N&AN=2005346193)  
802 [2005346193](http://ovidsp.ovid.com/ovidweb.cgi?T=JS&PAGE=reference&D=emed7&NEWS=N&AN=2005346193)
- 803 Långsjö, J. W., Salmi, E., Kaisti, K. K., Aalto, S., Hinkka, S., Aantaa, R., Oikonen, V., Viljanen,  
804 T., Kurki, T., Silvanto, M., & Scheinin, H. (2004). Effects of Subanesthetic Ketamine on  
805 Regional Cerebral Glucose Metabolism in Humans. *Anesthesiology*, *100*(5), 1065–1071.  
806 <https://doi.org/10.1097/00000542-200405000-00006>
- 807 Lee, U., Ku, S., Noh, G., Baek, S., Choi, B., & Mashour, G. A. (2013). Disruption of Frontal-  
808 Parietal Communication by Ketamine, Propofol, and Sevoflurane. *Anesthesiology*, *118*,  
809 1264–1275. <https://doi.org/10.1097/ALN.0b013e31829103f5>
- 810 Lempel, A., & Ziv, J. (1976). On the Complexity of Finite Sequences. *IEEE Transactions on*  
811 *Information Theory*, *22*(1), 75–81. <https://doi.org/10.1109/TIT.1976.1055501>
- 812 Li, D., & Mashour, G. A. (2019). Cortical dynamics during psychedelic and anesthetized states  
813 induced by ketamine. *NeuroImage*, *196*, 32–40.



- 814 <https://doi.org/10.1016/j.neuroimage.2019.03.076>
- 815 López-Gil, X., Jiménez-Sánchez, L., Campa, L., Castro, E., Frago, C., & Adell, A. (2019). Role  
816 of Serotonin and Noradrenaline in the Rapid Antidepressant Action of Ketamine. *ACS*  
817 *Chemical Neuroscience*, *10*(7), 3318–3326. <https://doi.org/10.1021/acschemneuro.9b00288>
- 818 López-Gil, X., Jiménez-Sánchez, L., Romón, T., Campa, L., Artigas, F., & Adell, A. (2012).  
819 Importance of inter-hemispheric prefrontal connection in the effects of non-competitive  
820 NMDA receptor antagonists. *International Journal of Neuropsychopharmacology*, *15*(7),  
821 945–956. <https://doi.org/10.1017/S1461145711001064>
- 822 Lorrain, D. S., Schaffhauser, H., Campbell, U. C., Baccei, C. S., Correa, L. D., Rowe, B.,  
823 Rodriguez, D. E., Anderson, J. J., Varney, M. A., Pinkerton, A. B., Vernier, J. M., &  
824 Bristow, L. J. (2003). Group II mGlu receptor activation suppresses norepinephrine release  
825 in the ventral hippocampus and locomotor responses to acute ketamine challenge.  
826 *Neuropsychopharmacology*, *28*(9), 1622–1632. <https://doi.org/10.1038/sj.npp.1300238>
- 827 Ma, Y., Shi, W., Peng, C. K., & Yang, A. C. (2018). Nonlinear dynamical analysis of sleep  
828 electroencephalography using fractal and entropy approaches. *Sleep Medicine Reviews*, *37*,  
829 85–93. <https://doi.org/10.1016/j.smr.2017.01.003>
- 830 Mateos, D. M., Guevara Erra, R., Wennberg, R., & Perez Velazquez, J. L. (2018). Measures of  
831 entropy and complexity in altered states of consciousness. *Cognitive Neurodynamics*, *12*(1),  
832 73–84. <https://doi.org/10.1007/s11571-017-9459-8>
- 833 Mediano, P. A. M., Ikkala, A., Kievit, R. A., Jagannathan, S. R., Varley, T. F., Stamatakis, E. A.,  
834 Bekinschtein, T. A., & Bor, D. (2021). Fluctuations in Neural Complexity During  
835 Wakefulness Relate To Conscious Level and Cognition. *BioRxiv*.  
836 <https://doi.org/10.1101/2021.09.23.461002>
- 837 Mediano, P. A. M., Rosas, F. E., Timmermann, C., Roseman, L., Nutt, D. J., Feilding, A.,  
838 Kaelen, M., Kringelbach, M. L., Barrett, A. B., Seth, A. K., Muthukumaraswamy, S., Bor,  
839 D., & Carhart-Harris, R. L. (2020). Effects of external stimulation on psychedelic state  
840 neurodynamics. *BioRxiv*, 2020.11.01.356071. <https://doi.org/10.1101/2020.11.01.356071>
- 841 Moghaddam, B., Adams, B., Verma, A., & Daly, D. (1997). Activation of Glutamatergic  
842 Neurotransmission by Ketamine: A Novel Step in the Pathway from NMDA Receptor  
843 Blockade to Dopaminergic and Cognitive Disruptions Associated with the Prefrontal  
844 Cortex. *The Journal of Neuroscience*, *17*(8), 2921–2927.

- 845 <https://doi.org/10.1523/JNEUROSCI.17-08-02921.1997>
- 846 Nilsen, A. S., Juel, B. E., & Storm, J. F. (2019). Measures of states of consciousness during  
847 attentional and cognitive load. *BioRxiv*, 0–39. <https://doi.org/10.1101/586149>
- 848 Pal, D., Li, D., Dean, J. G., Brito, M. A., Liu, T., Fryzel, A. M., Hudetz, A. G., & Mashour, G.  
849 A. (2020). Level of consciousness is dissociable from electroencephalographic measures of  
850 cortical connectivity, slow oscillations, and complexity. *Journal of Neuroscience*, *40*(3),  
851 605–618. <https://doi.org/10.1523/JNEUROSCI.1910-19.2019>
- 852 Pascovich, C., Castro, S., Velasquez, N., Bor, D., Canales-Johnson, A., Torterolo, P., &  
853 Bekinschtein, T. A. (2019). Complexity of cortical activity under subanesthetic doses of  
854 ketamine and during sleep. <https://doi.org/10.1101/586149>
- 855 Powers, A. R., Gancsos, M. G., Finn, E. S., Morgan, P. T., & Corlett, P. R. (2015). Ketamine-  
856 Induced Hallucinations. *Psychopathology*, *48*(6), 376–385.  
857 <https://doi.org/10.1159/000438675>
- 858 Sarasso, S., Boly, M., Napolitani, M., Gosseries, O., Charland-Verville, V., Casarotto, S.,  
859 Rosanova, M., Casali, A. G., Brichant, J. F., Boveroux, P., Rex, S., Tononi, G., Laureys, S.,  
860 & Massimini, M. (2015). Consciousness and complexity during unresponsiveness induced  
861 by propofol, xenon, and ketamine. *Current Biology*, *25*(23), 3099–3105.  
862 <https://doi.org/10.1016/j.cub.2015.10.014>
- 863 Sarasso, S., Casali, A. G., Casarotto, S., Rosanova, M., Sinigaglia, C., & Massimini, M. (2021).  
864 Consciousness and complexity: a consilience of evidence. *Neuroscience of Consciousness*,  
865 *7*, 1–24. <https://doi.org/10.1093/nc/niab023>
- 866 Schartner, M. M., Carhart-Harris, R. L., Barrett, A. B., Seth, A. K., & Muthukumaraswamy, S.  
867 D. (2017). Increased spontaneous MEG signal diversity for psychoactive doses of ketamine,  
868 LSD and psilocybin. *Scientific Reports*, *7*, 1–12. <https://doi.org/10.1038/srep46421>
- 869 Schartner, M. M., Pigorini, A., Gibbs, S. A., Arnulfo, G., Sarasso, S., Barnett, L., Nobili, L.,  
870 Massimini, M., Seth, A. K., & Barrett, A. B. (2017). Global and local complexity of  
871 intracranial EEG decreases during NREM sleep. *Neuroscience of Consciousness*, 1–12.  
872 <https://doi.org/10.1093/nc/niw022>
- 873 Schartner, M., Seth, A., Noirhomme, Q., Boly, M., Bruno, M. A., Laureys, S., & Barrett, A.  
874 (2015). Complexity of multi-dimensional spontaneous EEG decreases during propofol  
875 induced general anaesthesia. *PLoS ONE*, *10*(8), 1–21.

- 876 <https://doi.org/10.1371/journal.pone.0133532>
- 877 Schwartz, M. S., Viden, S., & Scott, D. F. (1974). Effects of ketamine on the  
878 electroencephalograph. *Anaesthesia*, 29(2), 135–140. [https://doi.org/10.1111/j.1365-](https://doi.org/10.1111/j.1365-2044.1974.tb00611.x)  
879 [2044.1974.tb00611.x](https://doi.org/10.1111/j.1365-2044.1974.tb00611.x)
- 880 Seamans, J. (2008). Losing inhibition with ketamine. *Nature Chemical Biology*, 4(2), 91–93.  
881 [https://doi.org/DOI: 10.1038/nchembio0208-91](https://doi.org/DOI:10.1038/nchembio0208-91)
- 882 Tagliazucchi, E., Carhart-Harris, R., Leech, R., Nutt, D., & Chialvo, D. R. (2014). Enhanced  
883 repertoire of brain dynamical states during the psychedelic experience. *Human Brain*  
884 *Mapping*, 35(11), 5442–5456. <https://doi.org/10.1002/hbm.22562>
- 885 Timmermann, C., Roseman, L., Schartner, M., Milliere, R., Williams, L. T. J., Erritzoe, D.,  
886 Muthukumaraswamy, S., Ashton, M., Bendrioua, A., Kaur, O., Turton, S., Nour, M. M.,  
887 Day, C. M., Leech, R., Nutt, D. J., & Carhart-Harris, R. L. (2019). Neural correlates of the  
888 DMT experience assessed with multivariate EEG. *Scientific Reports*, 9(1), 1–13.  
889 <https://doi.org/10.1038/s41598-019-51974-4>
- 890 Tononi, G., Boly, M., Massimini, M., & Koch, C. (2016). Integrated information theory: From  
891 consciousness to its physical substrate. *Nature Reviews Neuroscience*, 17(7), 450–461.  
892 <https://doi.org/10.1038/nrn.2016.44>
- 893 Tononi, G., & Edelman, G. M. (1998). Consciousness and complexity. *Science*, 282(5395),  
894 1846–1851. <https://doi.org/10.1126/science.282.5395.1846>
- 895 Torterolo, P., Yamuy, J., Sampogna, S., Morales, F. R., & Chase, M. H. (2003). Hypocretinergic  
896 Neurons are Primarily involved in Activation of the Somatomotor System. *Sleep*, 26(1), 25–  
897 28. <https://doi.org/10.1093/sleep/26.1.25>
- 898 Tsuda, N., Hayashi, K., Hagihira, S., & Sawa, T. (2007). Ketamine, an NMDA-antagonist,  
899 increases the oscillatory frequencies of  $\alpha$ -peaks on the electroencephalographic power  
900 spectrum. *Acta Anaesthesiologica Scandinavica*, 51(4), 472–481.  
901 <https://doi.org/10.1111/j.1399-6576.2006.01246.x>
- 902 Windt, J. M., & Noreika, V. (2011). How to integrate dreaming into a general theory of  
903 consciousness-A critical review of existing positions and suggestions for future research.  
904 *Consciousness and Cognition*, 20(4), 1091–1107.  
905 <https://doi.org/10.1016/j.concog.2010.09.010>
- 906 Zanos, P., Moaddel, R., Morris, P. J., Riggs, L. M., Highland, J. N., Georgiou, P., Pereira, E. F.

- 907 R., Albuquerque, E. X., Thomas, C. J., Zarate, C. A., & Gould, T. D. (2018). Ketamine and  
908 ketamine metabolite pharmacology: Insights into therapeutic mechanisms. *Pharmacological*  
909 *Reviews*, 70(3), 621–660. <https://doi.org/10.1124/pr.117.015198>
- 910 Zhang, X. S., Roy, R. J., & Jensen, E. W. (2001). EEG complexity as a measure of depth of  
911 anesthesia for patients. *IEEE Transactions on Biomedical Engineering*, 48(12), 1424–1433.  
912 <https://doi.org/10.1109/10.966601>
- 913 Zhou, C., Douglas, J. E., Kumar, N. N., Shu, S., Bayliss, D. A., & Chen, X. (2013). Forebrain  
914 HCN1 channels contribute to hypnotic actions of ketamine. *Anesthesiology*, 118(4), 785–  
915 795. <https://doi.org/10.1097/ALN.0b013e318287b7c8>
- 916 Ziv, J., & Lempel, A. (1978). Compression of individual sequences via variable-rate coding.  
917 *IEEE Transactions on Information Theory*, 24(5), 530–536.
- 918
- 919
